# Supplementary material for: Phytic acid as a biorenewable catalyst for cellulose pyrolysis to produce levoglucosenone
Source: Royal Society of Chemistry journal article supplement (doi:10.1039/d4su00502c), 2024-11-25
Supplement: d4su00502c1.pdf [file d4su00502c1.pdf]

## Supplementary Information

# Phytic Acid as a Biorenewable Catalyst for Cellulose Pyrolysis to Produce Levoglucosenone

*Tsinjo Nirina Rafenomananjara<sup>a</sup>, Shinji Kudo<sup>\*a,b</sup>, Jonathan Sperry<sup>c</sup>, Shusaku Asano<sup>b</sup>, and Jun-ichiro Hayashi<sup>a,b</sup>*

<sup>a</sup> Interdisciplinary Graduate School of Engineering Sciences and <sup>b</sup> Institute for Materials Chemistry and Engineering, Kyushu University, 6-1 Kasuga Koen, Kasuga, 816-8580, Japan

<sup>c</sup> Centre for Green Chemical Science, School of Chemical Sciences, University of Auckland, 23 Symonds Street, Auckland, New Zealand.

\* Email: shinji\_kudo@cm.kyushu-u.ac.jp

### Table of Contents

|         |                                                                                                                                                                                                                                                                                                                                                |
|---------|------------------------------------------------------------------------------------------------------------------------------------------------------------------------------------------------------------------------------------------------------------------------------------------------------------------------------------------------|
| Page S2 | TGA of cellulose and cellulose loaded with 0.3 wt% PA. A brief explanation for kinetic analysis with DAEM ( <b>Figure S1</b> )                                                                                                                                                                                                                 |
| Page S3 | FT-IR of cellulose loaded with 1.0 wt% PA after pyrolysis at different temperatures. ( <b>Figure S2</b> ), TGA of PA ( <b>Figure S3</b> ), <sup>31</sup> P solution NMR spectrum of PA (aqueous standard solution) and aqueous extracts from char after pyrolysis of cellulose loaded with 1.0 wt% PA at 200°C and 300°C. ( <b>Figure S4</b> ) |
| Page S4 | <sup>31</sup> P solid-state NMR spectrum of chars prepared by pyrolysis of cellulose loaded with 1.0 wt% phosphoric acid at different temperatures ( <b>Figure S5</b> ), XRD patterns of cellulose samples ( <b>Figure S6</b> ), N <sub>2</sub> ad/desorption isotherms of chars ( <b>Figure S7</b> )                                          |
| Page S5 | GC/MS chromatograms of liquid product from slow pyrolysis of cellulose ( <b>Figure S8</b> ), Kinetic parameters obtained from DAEM analysis of pyrolysis curves for cellulose and cellulose loaded with 0.3 wt% PA ( <b>Table S1</b> )                                                                                                         |

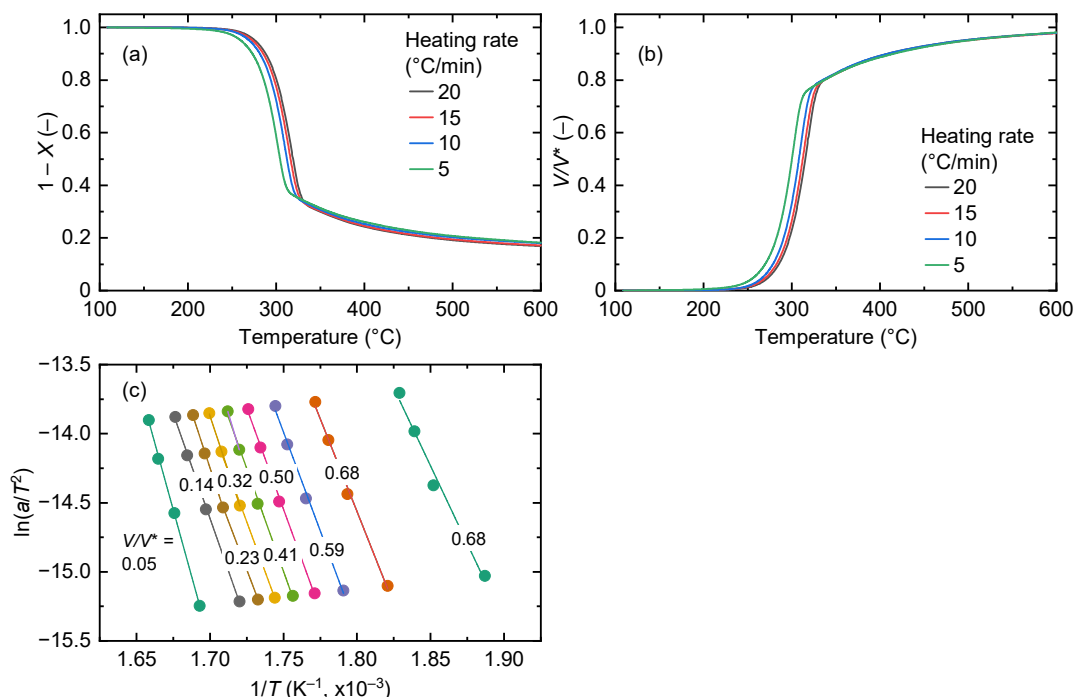

**Figure S1.** TGA of cellulose loaded with 0.3 wt% PA. A brief explanation for kinetic analysis with DAEM proposed by Miura et al.<sup>35</sup> using the result for cellulose loaded with 0.3 wt% PA as an example. (a) Pyrolysis curves were obtained from TGA experiments at different heating rates ( $a = 5, 10, 15$ , and  $20$  °C/min). The mass, measured during TGA, was transformed to relative mass with  $X$  as the conversion to volatiles on a dry mass basis. (b) The vertical axis was further converted to  $V/V^*$ , where  $V$  stands for the mass yield of volatiles released from the sample, and  $V^*$  stands for  $V$  at completion of volatiles release. In this work,  $V^*$  was defined as the yield of volatiles at  $800$  °C during the measurement at  $20$  °C/min.  $V^*$  was  $0.958$  and  $0.848$  for cellulose and cellulose loaded with  $0.3$  wt% PA, respectively. (c) The employed DAEM uses equation below for calculating kinetic parameters at different conversion levels, where  $E$ ,  $k_0$ , and  $R$  represent activation energy, frequency factor, and gas constant, respectively. From the data of  $V/V^*-T$  plot,  $\ln(a/T^2)$  and  $1/T$  at selected  $V/V^*$  were calculated and used for the Arrhenius plot, as shown in Figure S1 (c). The calculated values of  $E$  and  $k_0$  are listed in Table S1. The value of  $V/V^*$  was set in increments of  $0.03$ , ranging from  $0.05$  to  $0.95$  for cellulose and from  $0.05$  to  $0.77$  for cellulose loaded with  $0.3$  wt% PA. Outside the set range of  $V/V^*$ , differences in the values caused by heating rate were negligibly small, making the kinetic analysis difficult.

$$\ln \frac{a}{T^2} = \ln \frac{k_0 R}{E} + 0.6075 - \frac{E}{RT}$$

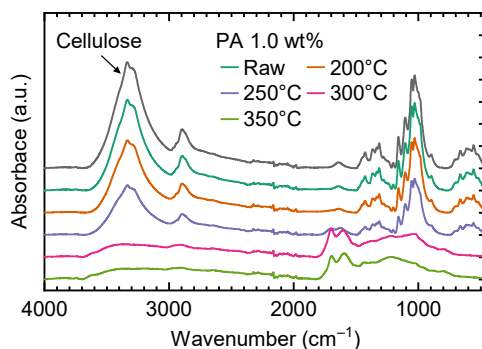

**Figure S2.** Fourier transform infrared spectroscopy (FT-IR) of cellulose loaded with 1.0 wt% PA after pyrolysis at different temperatures. FT-IR analysis was carried out in an attenuated total reflectance (ATR) mode on a PerkinElmer Spectrum two.

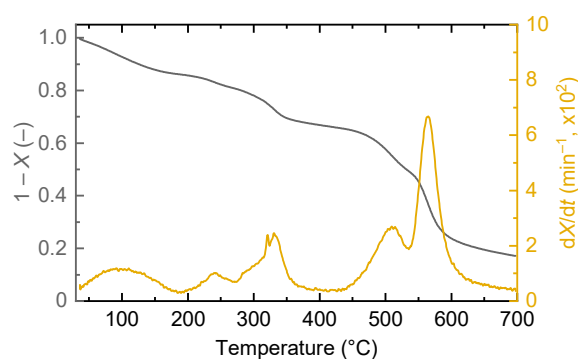

**Figure S3.** TGA of PA under a flow of N<sub>2</sub> at 10 °C/min. PA contained about 20 wt% of water, which was lost below 200°C.

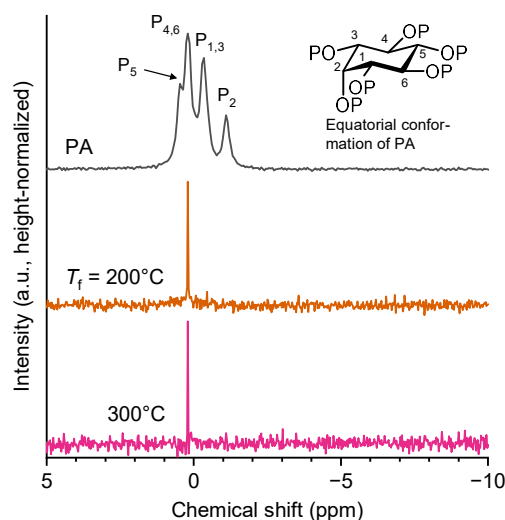

**Figure S4.** <sup>31</sup>P solution NMR spectrum of PA (aqueous standard solution) and aqueous extracts from char after pyrolysis of cellulose loaded with 1.0 wt% PA at 200°C and 300°C. P = -PO<sub>3</sub>H<sub>2</sub>, -PO<sub>3</sub>H<sup>-</sup>, or -PO<sub>3</sub><sup>2-</sup>, depending on pH.<sup>50</sup>

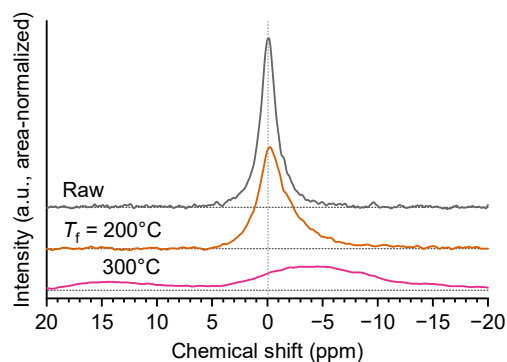

**Figure S5.**  $^{31}\text{P}$  solid-state NMR spectrum of chars prepared by pyrolysis of cellulose loaded with 1.0 wt% phosphoric acid at different temperatures.

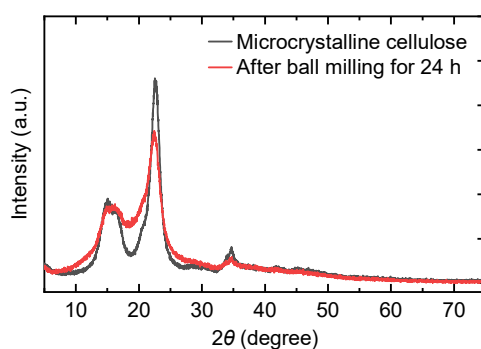

**Figure S6.** XRD patterns of cellulose before and after ball-milling. CrI decreased from 85.6% to 60.0% with the ball-milling.

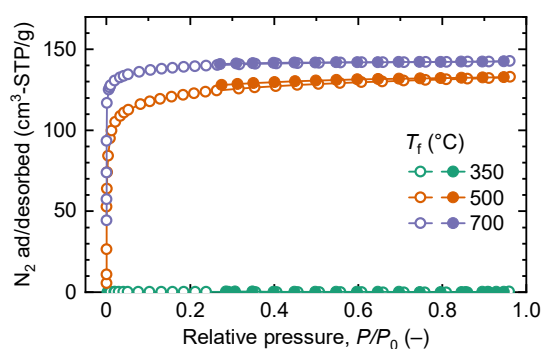

**Figure S7.**  $\text{N}_2$  ad/desorption isotherms of chars prepared at different  $T_f$ . BET surface area calculated from the isotherms were 1.0, 472, and 550  $\text{m}^2/\text{g}$  for chars prepared at 350, 500, and 700°C, respectively.

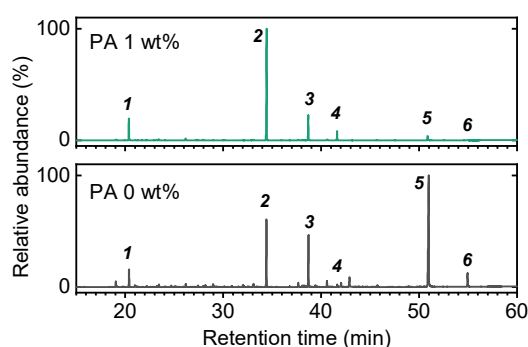

**Figure S8.** GC/MS chromatogram of liquid product from slow pyrolysis of cellulose loaded with 1.0 wt% PA and without PA: 1) furfural, 2) LGO, 3) DGP, 4) ADGH, 5) LGA, and 6) AGF.

**Table S1.** Kinetic parameters obtained from DAEM analysis of pyrolysis curves for cellulose and cellulose loaded with 0.3 wt% PA.

| Cellulose   |         |              |                       |        | Cellulose loaded with 0.3 wt% PA |         |              |                       |        |
|-------------|---------|--------------|-----------------------|--------|----------------------------------|---------|--------------|-----------------------|--------|
| $V/V^*$ (-) | $X$ (-) | $E$ (kJ/mol) | $k_0$ ( $s^{-1}$ )    | $R^2$  | $V/V^*$ (-)                      | $X$ (-) | $E$ (kJ/mol) | $k_0$ ( $s^{-1}$ )    | $R^2$  |
| 0.05        | 0.048   | 209          | $1.67 \times 10^{16}$ | 0.9977 | 0.05                             | 0.042   | 187          | $1.02 \times 10^{16}$ | 0.9871 |
| 0.08        | 0.076   | 203          | $3.80 \times 10^{15}$ | 0.9989 | 0.08                             | 0.067   | 203          | $1.82 \times 10^{17}$ | 0.9920 |
| 0.11        | 0.105   | 200          | $1.45 \times 10^{15}$ | 0.9994 | 0.11                             | 0.093   | 216          | $1.87 \times 10^{18}$ | 0.9939 |
| 0.14        | 0.133   | 199          | $1.08 \times 10^{15}$ | 0.9994 | 0.14                             | 0.118   | 223          | $6.55 \times 10^{18}$ | 0.9960 |
| 0.17        | 0.162   | 198          | $6.90 \times 10^{14}$ | 0.9994 | 0.17                             | 0.143   | 232          | $3.37 \times 10^{19}$ | 0.9958 |
| 0.20        | 0.190   | 197          | $5.33 \times 10^{14}$ | 0.9997 | 0.20                             | 0.168   | 235          | $5.33 \times 10^{19}$ | 0.9960 |
| 0.23        | 0.219   | 196          | $3.97 \times 10^{14}$ | 0.9998 | 0.23                             | 0.194   | 238          | $6.87 \times 10^{19}$ | 0.9967 |
| 0.26        | 0.247   | 195          | $2.97 \times 10^{14}$ | 0.9998 | 0.26                             | 0.219   | 240          | $9.04 \times 10^{19}$ | 0.9965 |
| 0.29        | 0.276   | 194          | $2.07 \times 10^{14}$ | 0.9996 | 0.29                             | 0.244   | 242          | $1.25 \times 10^{20}$ | 0.9969 |
| 0.32        | 0.304   | 193          | $1.53 \times 10^{14}$ | 0.9993 | 0.32                             | 0.269   | 243          | $1.38 \times 10^{20}$ | 0.9980 |
| 0.35        | 0.333   | 191          | $9.86 \times 10^{13}$ | 0.9995 | 0.35                             | 0.294   | 245          | $1.75 \times 10^{20}$ | 0.9979 |
| 0.38        | 0.361   | 192          | $1.19 \times 10^{13}$ | 0.9996 | 0.38                             | 0.320   | 246          | $1.58 \times 10^{20}$ | 0.9988 |
| 0.41        | 0.390   | 189          | $6.60 \times 10^{13}$ | 0.9995 | 0.41                             | 0.345   | 247          | $2.07 \times 10^{20}$ | 0.9976 |
| 0.44        | 0.418   | 189          | $5.90 \times 10^{13}$ | 0.9997 | 0.44                             | 0.370   | 246          | $1.43 \times 10^{20}$ | 0.9982 |
| 0.47        | 0.447   | 188          | $4.27 \times 10^{13}$ | 0.9996 | 0.47                             | 0.395   | 247          | $1.54 \times 10^{20}$ | 0.9980 |
| 0.50        | 0.475   | 186          | $2.82 \times 10^{13}$ | 0.9996 | 0.50                             | 0.421   | 247          | $1.30 \times 10^{20}$ | 0.9985 |
| 0.53        | 0.504   | 186          | $2.48 \times 10^{13}$ | 0.9996 | 0.53                             | 0.446   | 248          | $1.53 \times 10^{20}$ | 0.9980 |
| 0.56        | 0.533   | 185          | $2.04 \times 10^{13}$ | 0.9996 | 0.56                             | 0.471   | 248          | $1.17 \times 10^{20}$ | 0.9986 |
| 0.59        | 0.561   | 185          | $1.76 \times 10^{13}$ | 0.9999 | 0.59                             | 0.496   | 249          | $1.33 \times 10^{20}$ | 0.9981 |
| 0.62        | 0.590   | 182          | $9.53 \times 10^{12}$ | 0.9995 | 0.62                             | 0.522   | 250          | $1.42 \times 10^{20}$ | 0.9983 |
| 0.65        | 0.618   | 182          | $8.26 \times 10^{12}$ | 0.9996 | 0.65                             | 0.547   | 250          | $1.41 \times 10^{20}$ | 0.9985 |
| 0.68        | 0.647   | 181          | $7.32 \times 10^{12}$ | 0.9998 | 0.68                             | 0.572   | 252          | $1.78 \times 10^{20}$ | 0.9989 |
| 0.71        | 0.675   | 179          | $4.00 \times 10^{12}$ | 0.9996 | 0.71                             | 0.597   | 257          | $4.66 \times 10^{20}$ | 0.9994 |
| 0.74        | 0.704   | 179          | $3.88 \times 10^{12}$ | 0.9998 | 0.74                             | 0.623   | 278          | $2.52 \times 10^{22}$ | 0.9994 |
| 0.77        | 0.732   | 177          | $2.78 \times 10^{12}$ | 0.9998 | 0.77                             | 0.648   | 320          | $1.05 \times 10^{26}$ | 0.9990 |
| 0.80        | 0.761   | 177          | $2.21 \times 10^{12}$ | 0.9997 |                                  |         |              |                       |        |
| 0.83        | 0.789   | 175          | $1.37 \times 10^{12}$ | 0.9998 |                                  |         |              |                       |        |
| 0.86        | 0.818   | 173          | $9.20 \times 10^{11}$ | 0.9998 |                                  |         |              |                       |        |
| 0.89        | 0.846   | 172          | $6.42 \times 10^{11}$ | 0.9996 |                                  |         |              |                       |        |
| 0.92        | 0.875   | 173          | $7.19 \times 10^{11}$ | 0.9994 |                                  |         |              |                       |        |
| 0.95        | 0.903   | 172          | $4.56 \times 10^{11}$ | 0.9987 |                                  |         |              |                       |        |
